# Supplementary material for: Intra‐arterial transplantation of HLA‐matched donor mesoangioblasts in Duchenne muscular dystrophy
Source: PubMed Central journal article supplement (PMC4693504; doi:10.15252/emmm.201505636), 2015-11-05

figure 3E myosin

Ct Pt01

Ct Pt01

Ct Pt01

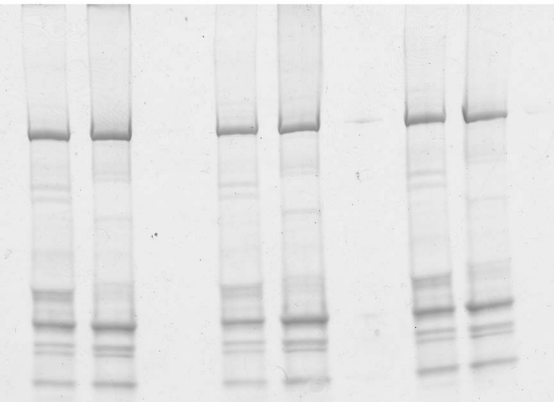

figure 3E

Ct Pt01  
C

Ct Pt01  
C

Ct Pt01  
C

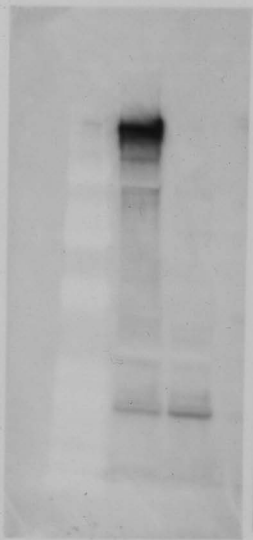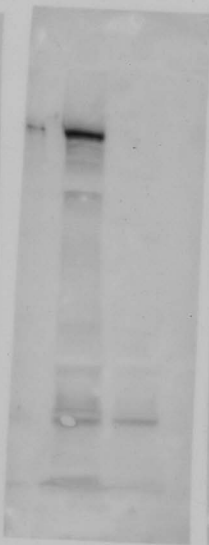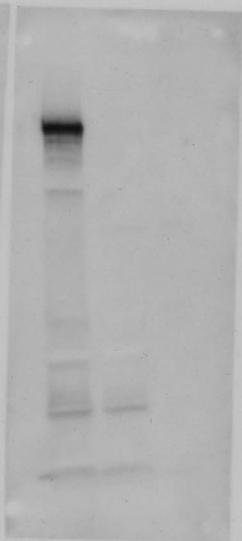

DYS 1

18

46

↓     ↓     ↓  
Ct   Ct   Pt02  
Ct   Dmd   pre

FIGURE 3F  
mandys46

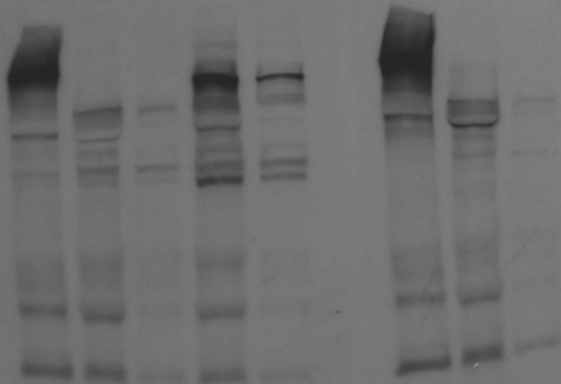

FIGURE 3F  
myosin

↓      ↓      ↓  
Ct      Ct      Pt02  
Dmd    pre

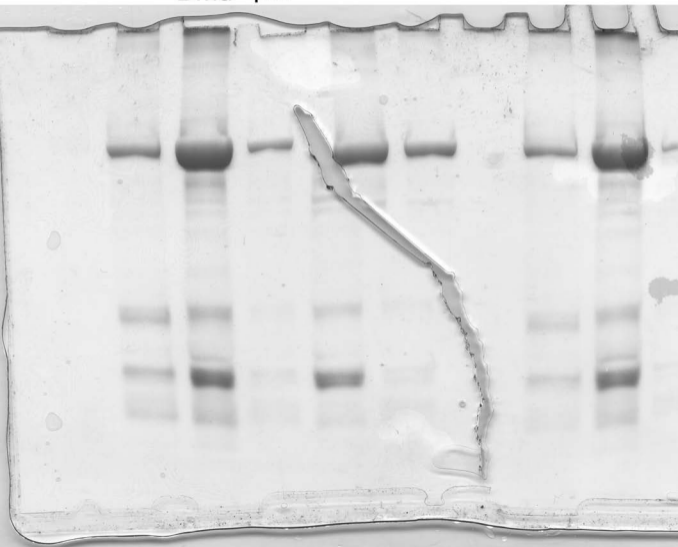

figure 3F  
man46

Ct Pt02  
post

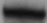

46

FIGURE 3F myosin

Ct      Pt02 post  
↓      ↓

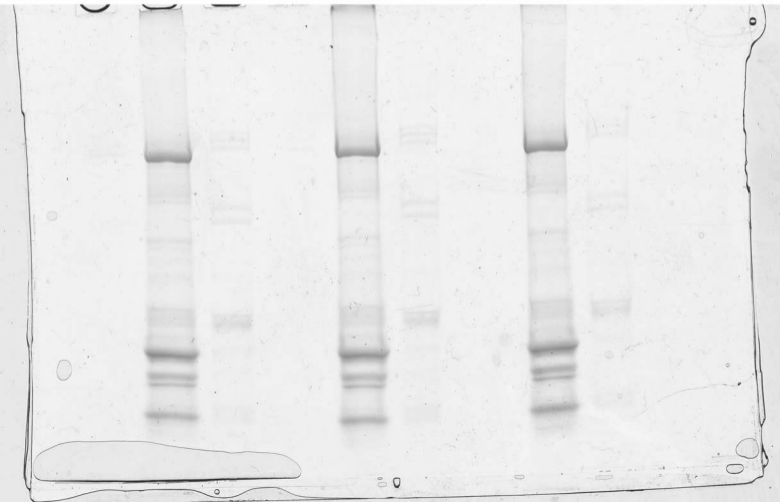

# FIGURE 3F

mk Pt02 Ct Pt02  
pre post

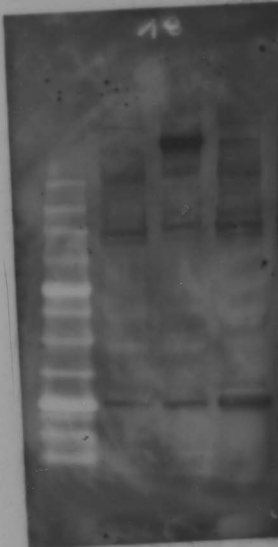

# FIGURE 3F myosin

Pt02  
pre

Ct

Pt02  
post

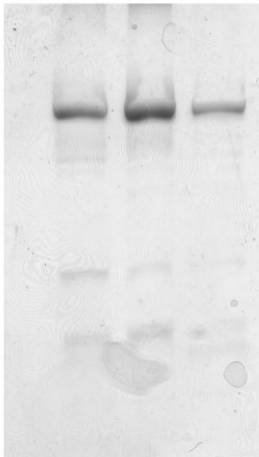



FIGURE 3G

Man106

dys1

Ct Pt05 Pt05  
pre post

Ct Pt05 Pt05  
pre post

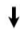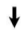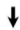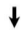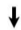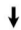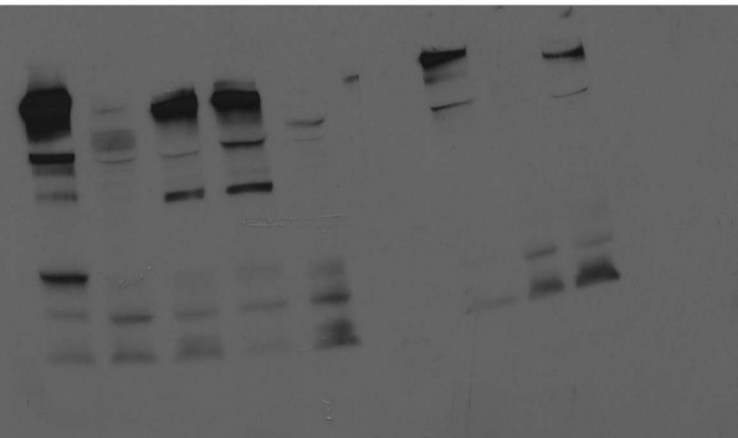

FIGURE 3G myosin

↓      ↓      ↓                      ↓      ↓      ↓  
Ct      Pt05 Pt05                      Ct      Pt05 Pt05  
pre    post

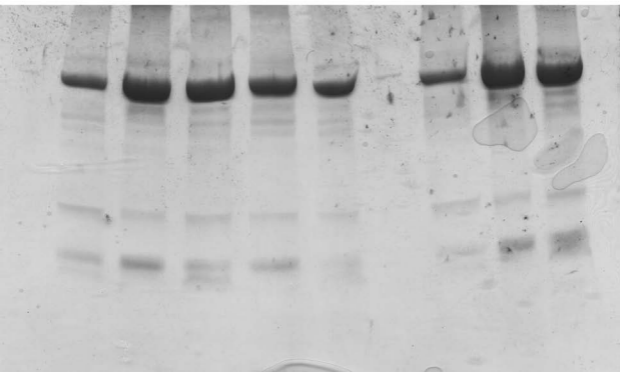

FIGURE 3H  
man106

Ct  
↓

Pt06 Pt06  
pre post  
↓ ↓

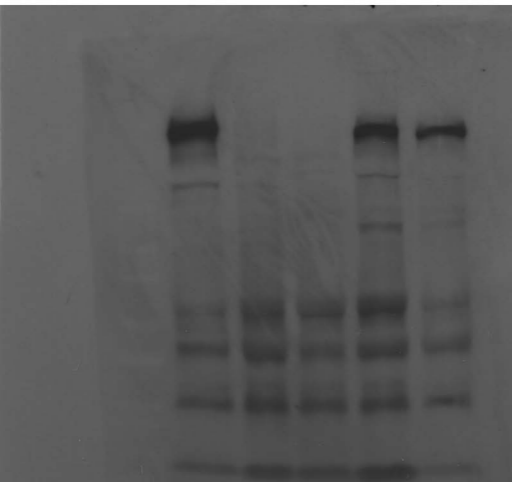

figure 3H

myosin

Ct

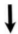

Pt06 Pt06

pre

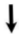

post

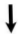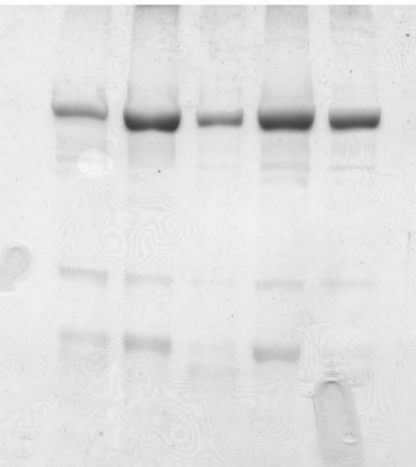

FIGURE 3H

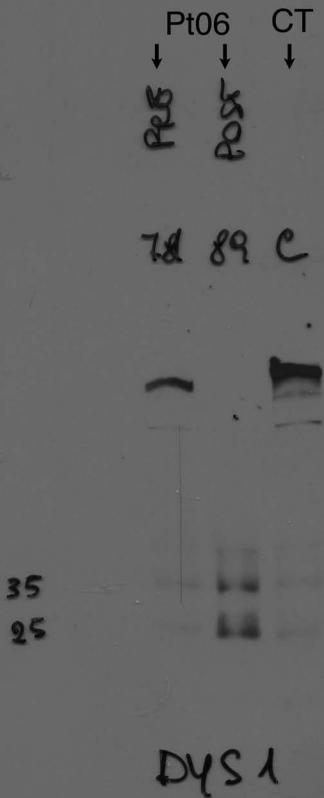

# FIGURE 3H myosin

Pt06  
pre

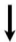

Pt06  
post

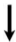

Ct

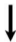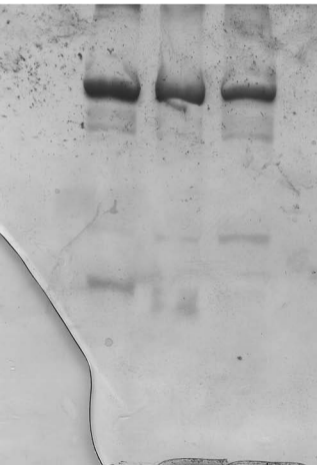

Supplement: EMMM-7-1513-s002.pdf [file EMMM-7-1513-s002.pdf]
